# Supplementary material for: Nanostructuring of nanoporous iron carbide spheres via thermal degradation of triple-shelled Prussian blue hollow spheres for oxygen reduction reaction
Source: Royal Society of Chemistry journal article supplement (doi:10.1039/c5ra24357b), 2016-01-01
Supplement: c5ra24357b1.pdf [file c5ra24357b1.pdf]

## Electronic Supplementary Information

Figure S1

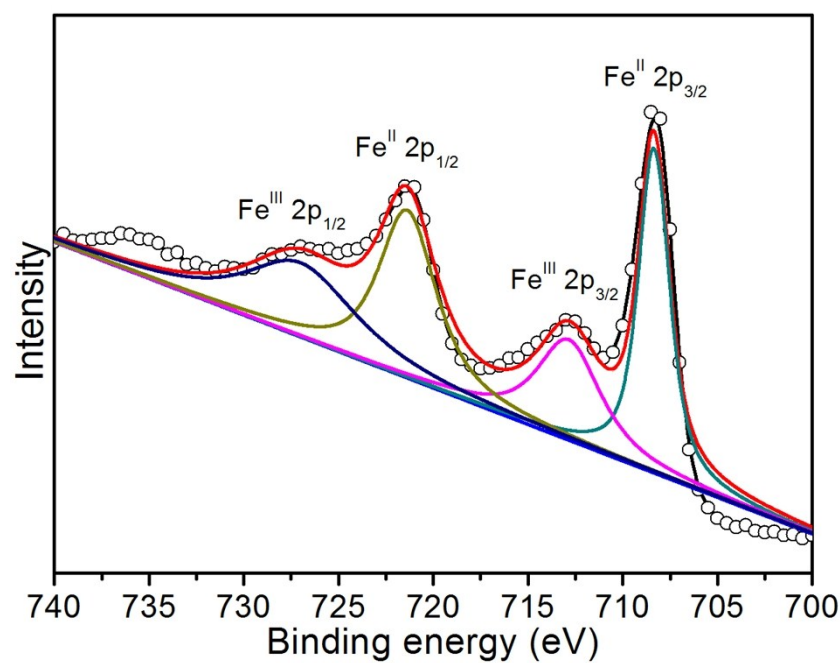

**Figure S1** High resolution XPS spectra of Fe 2p orbital for TPBHS.

**Figure S2**

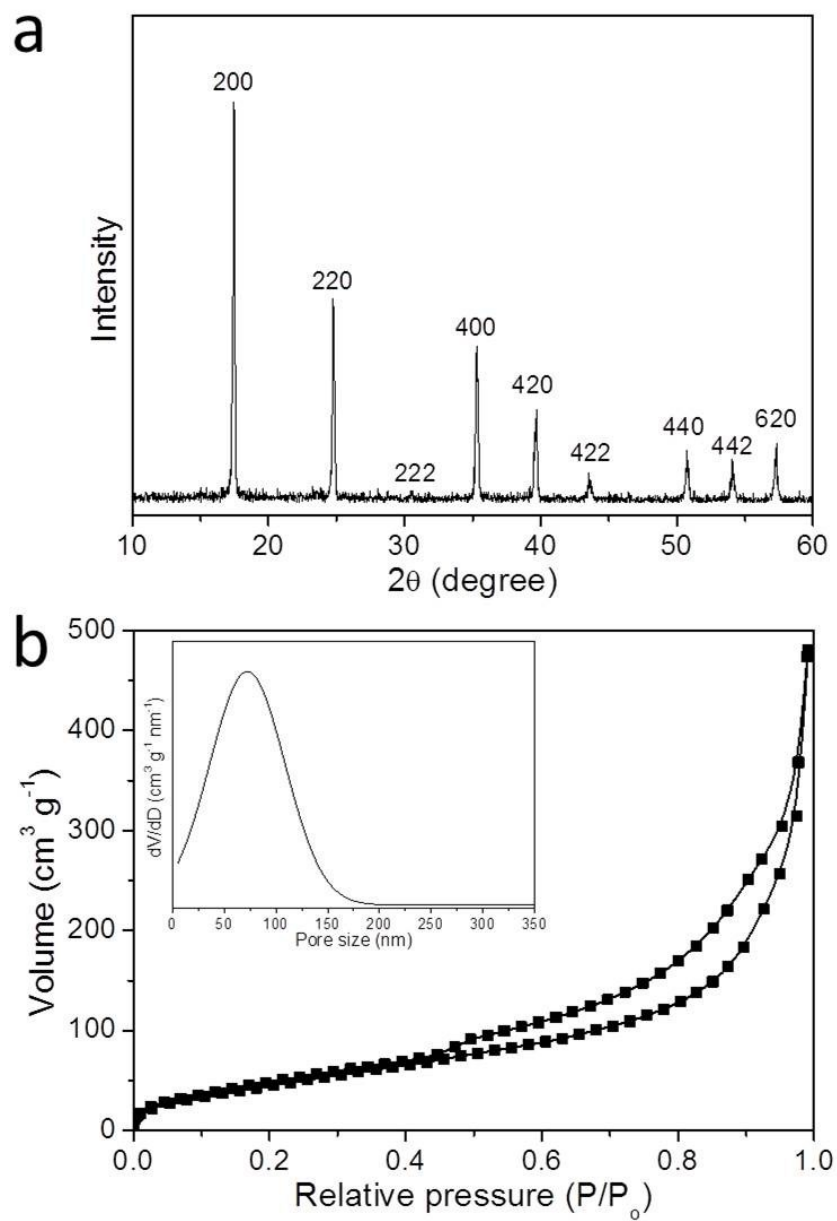

**Figure S2** a) Wide-angle XRD patterns and b) Nitrogen gas adsorption-desorption isotherms of TPBHS (inset; pore size distribution curve).

**Figure S3**

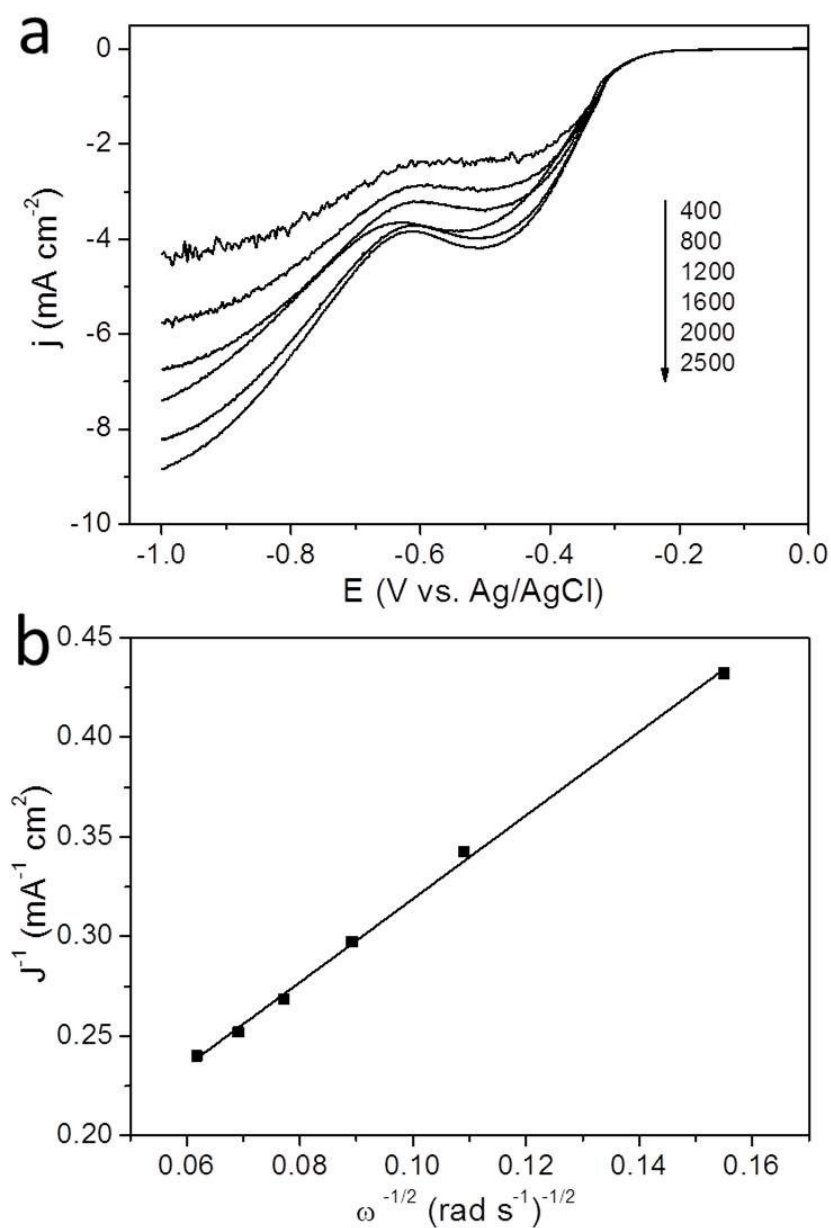

**Figure S3** a) Polarization curves of NIC at different rotation rates in  $\text{O}_2$ -saturated 0.1 M KOH solutions with a scan rate of  $10 \text{ mV s}^{-1}$  and b) the corresponding Koutecky-Levich plot of  $j^{-1}$  vs.  $\omega^{-1/2}$ . These measurements were carried out using Pt-wire as a counter electrode.

**Figure S4**

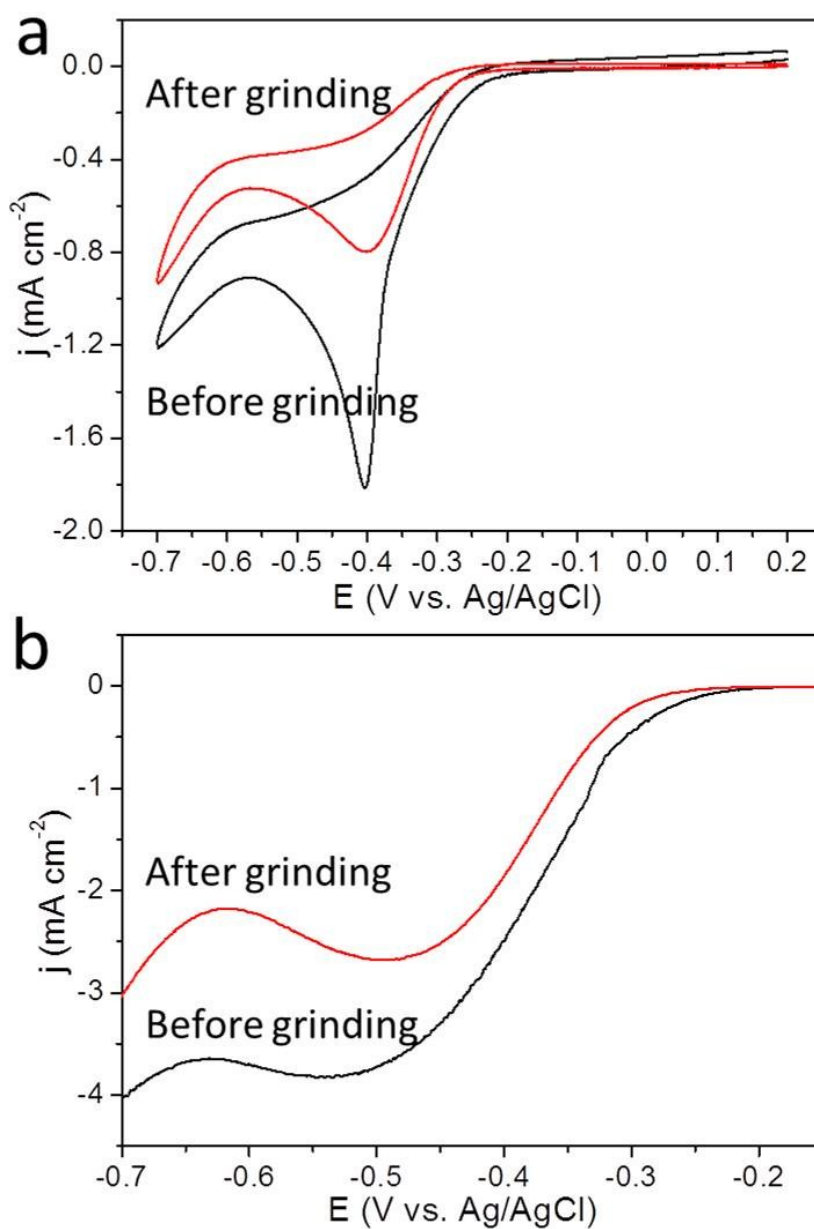

**Figure S4** a) Cyclic voltammetric curves obtained under  $O_2$ -saturated 0.1 M KOH solutions catalyzed by NIC a scan rate of  $20\ mV\ s^{-1}$  before and after grinding. b) ORR polarization curves of the rotating disk electrode modified with NIC in an  $O_2$ -saturated 0.1 M KOH solution at a rotation rate of 1600 rpm and a scan rate of  $10\ mV\ s^{-1}$  before and after grinding.
